# Supplementary material for: Ultraviolet damage and repair maps inDrosophilareveal the impact of domain-specific changes in nucleosome repeat length on repair efficiency
Source: HighWire-hosted journal article supplement (doi:10.1101/gr.279605.124), 2025-01-06
Supplement: Supplemental_Fig_S1.pdf [file Supplemental_Fig_S1.pdf]

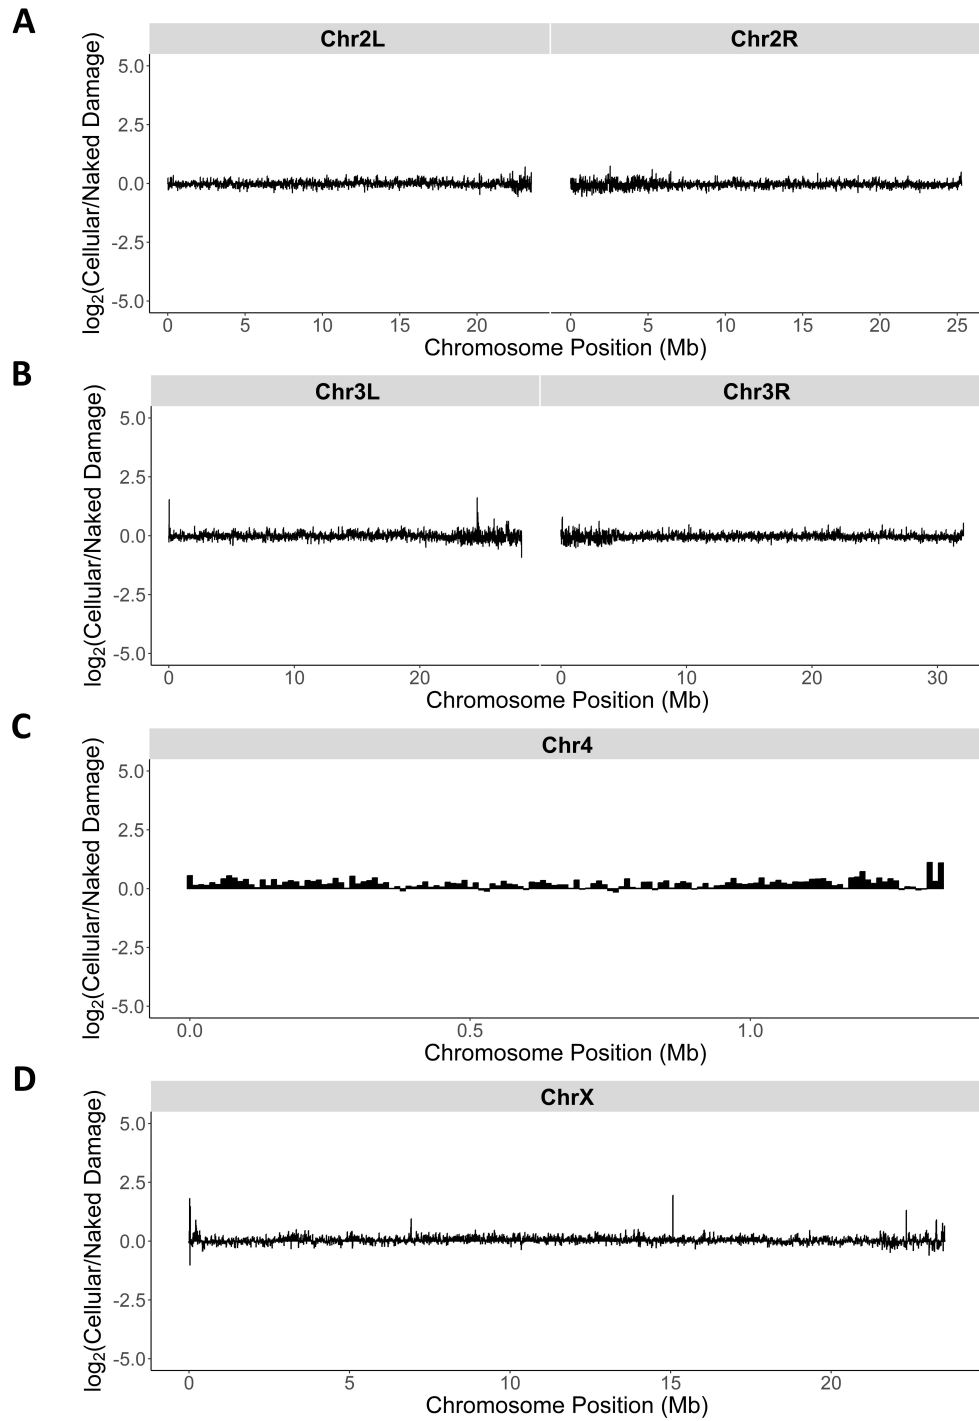

**Figure S1: CPD enrichment does not vary substantially across the *Drosophila* genome. (A-D)**

Relative CPD enrichment binned in 10,000-bp regions across Chromosomes 2 (A), 3 (B), 4 (C), and X (D) of the *Drosophila* genome. CPD enrichment is normalized to a UV-exposed, naked DNA control.
