# Supplementary material for: Ultraviolet damage and repair maps inDrosophilareveal the impact of domain-specific changes in nucleosome repeat length on repair efficiency
Source: HighWire-hosted journal article supplement (doi:10.1101/gr.279605.124), 2025-01-06
Supplement: Supplemental_Fig_S2.pdf [file Supplemental_Fig_S2.pdf]

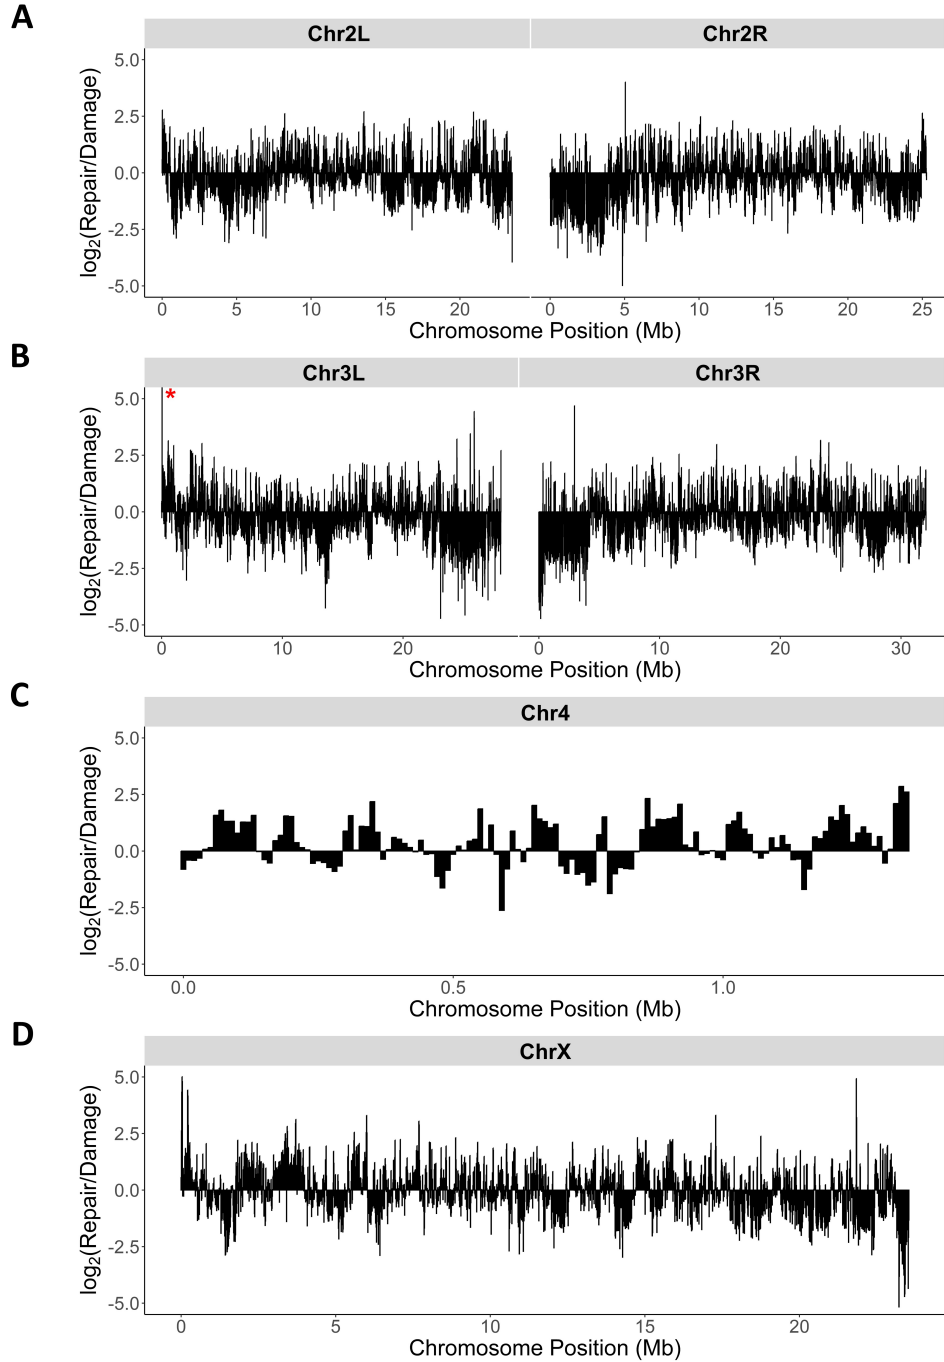

**Figure S2: CPD repair activity is variable across the *Drosophila* genome.** (A-D) Relative CPD repair activity (30 min) binned in 10,000-bp regions across Chromosomes 2 (A), 3 (B), 4 (C), and X (D) of the *Drosophila* genome. Repair data is normalized to cellular damage data. The data point marked with the red asterisk extends beyond the bounds of the plot and has a log<sub>2</sub>(Repair/Damage) value of 8.2.
