# Supplementary material for: Ultraviolet damage and repair maps inDrosophilareveal the impact of domain-specific changes in nucleosome repeat length on repair efficiency
Source: HighWire-hosted journal article supplement (doi:10.1101/gr.279605.124), 2025-01-06
Supplement: Supplemental_Fig_S3.pdf [file Supplemental_Fig_S3.pdf]

**A**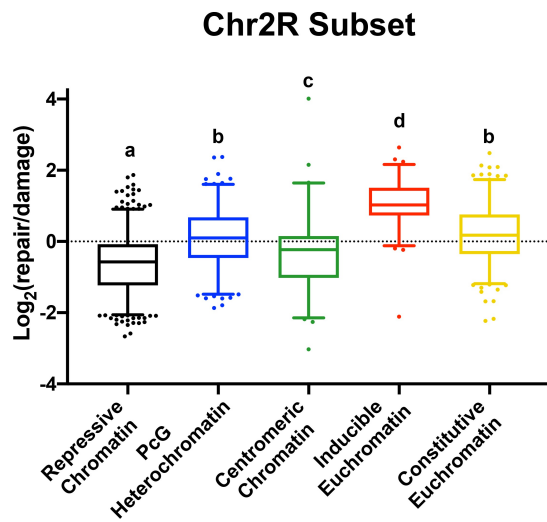**B**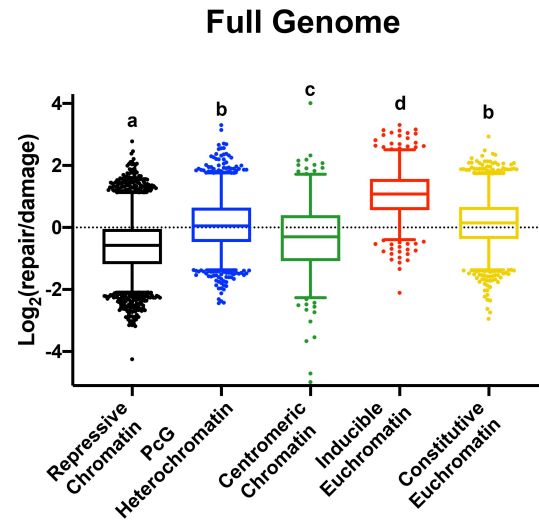

**Figure S3 Repair activity is significantly different across chromatin types genome-wide. (A,B)**

Distribution of repair activity (30min) for bins of each chromatin type in the Chromosome 2R subset from figure 2C (A) and genome-wide (B). Data is normalized to cellular damage levels. The letters above each plot categorize statistically different distributions, as determined by a one-way ANOVA and Tukey's multiple comparisons test ( $p < 0.01$ ). Outliers beyond the whiskers of each plot represent the bottom 2.5% and top 2.5% of that distribution.
