# Supplementary material for: Ultraviolet damage and repair maps inDrosophilareveal the impact of domain-specific changes in nucleosome repeat length on repair efficiency
Source: HighWire-hosted journal article supplement (doi:10.1101/gr.279605.124), 2025-01-06
Supplement: Supplemental_Fig_S4.pdf [file Supplemental_Fig_S4.pdf]

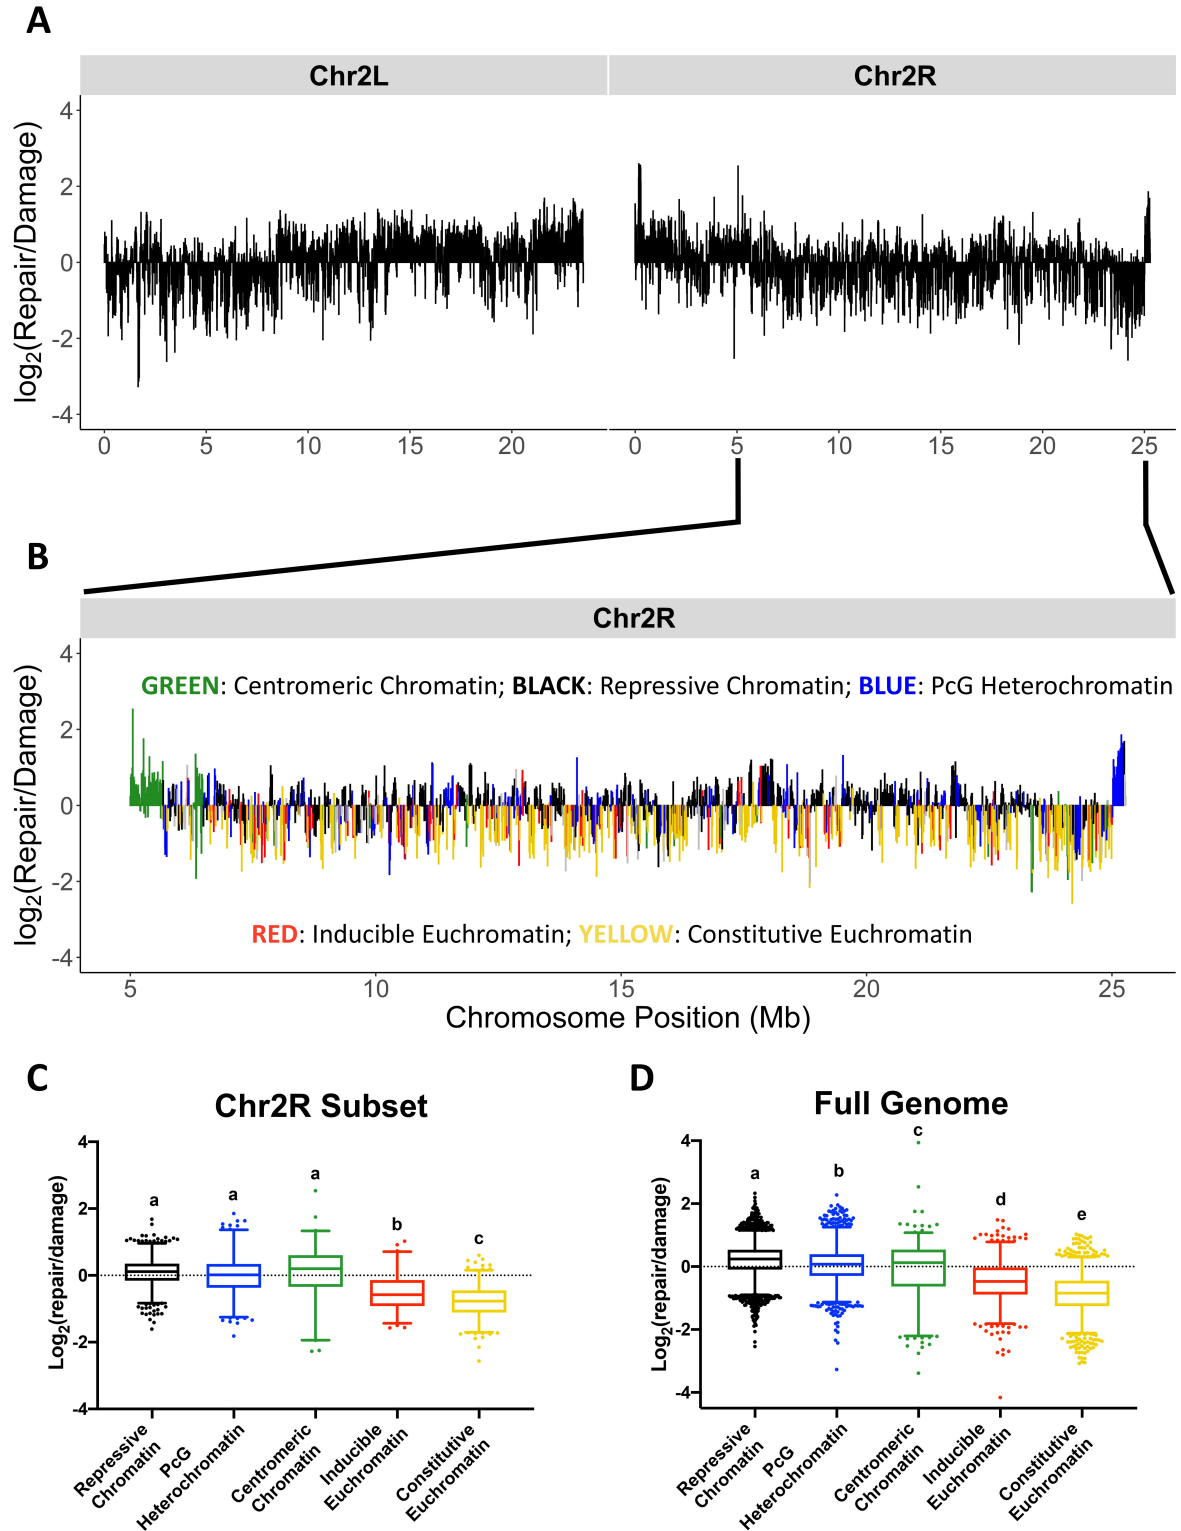

**Figure S4: Relative repair activity between chromatin domains is reversed after 24 hours of repair compared to 30 minutes. (A) CPD repair data (24h) across Chromosome 2 of the *Drosophila***

genome. Data is normalized to cellular damage levels. **(B)** Chromatin domains superimposed on repair data. Data is zoomed in on positions between 5Mb and the end of Chromosome 2R for increased bin resolution and to exclude the centromere-proximal region which does not have defined domains. Chromatin type was assigned when at least 50% of the bin was covered by regions assigned to that type. Bins that failed to meet this threshold are colored grey. **(C,D)** Distribution of repair activity for bins of each chromatin type in the Chromosome 2R subset (C) and genome-wide (D). The letters above each plot categorize statistically different distributions, as determined by a one-way ANOVA and Tukey's multiple comparisons test ( $p < 0.01$ ). Outliers beyond the whiskers of each plot represent the bottom 2.5% and top 2.5% of that distribution.
