# Supplementary material for: Ultraviolet damage and repair maps inDrosophilareveal the impact of domain-specific changes in nucleosome repeat length on repair efficiency
Source: HighWire-hosted journal article supplement (doi:10.1101/gr.279605.124), 2025-01-06
Supplement: Supplemental_Fig_S5.pdf [file Supplemental_Fig_S5.pdf]

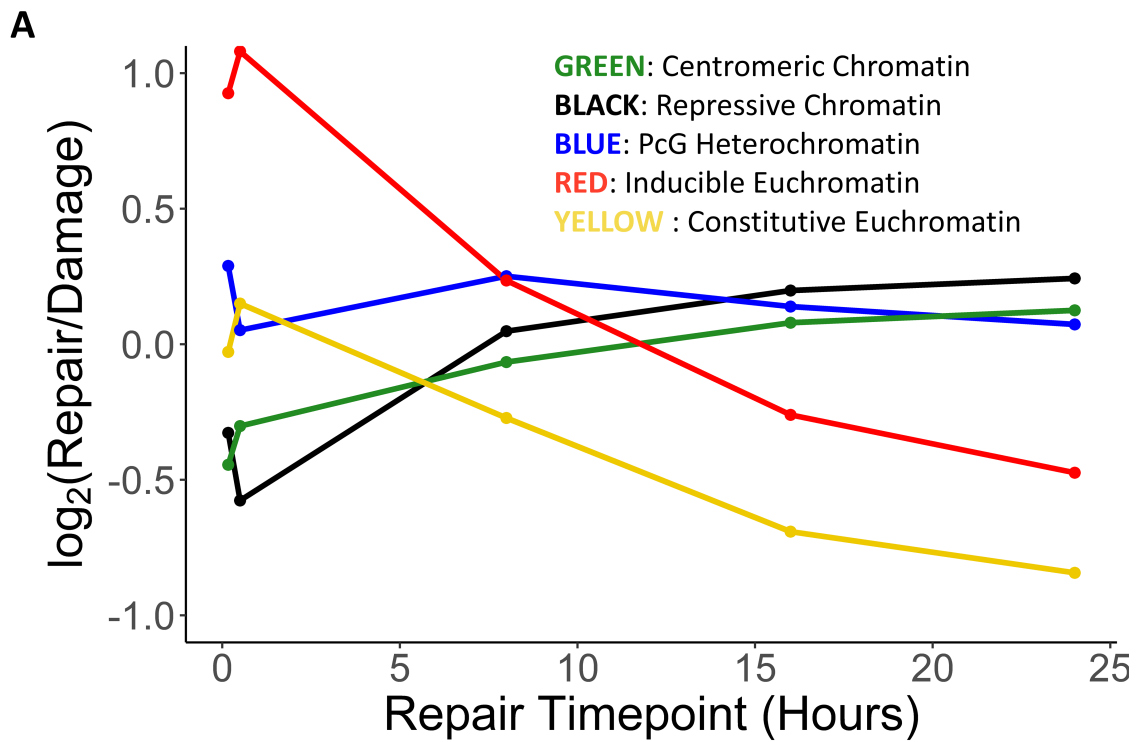

**Figure S5: CPD repair activity decreases over time in euchromatin domains but increases in heterochromatin domains. (A)** CPD repair dynamics over time, stratified by chromatin type. Repair time points are 10min, 30min, 8h, 16h, and 24h. Data is normalized to cellular damage data.
