# Supplementary material for: Ultraviolet damage and repair maps inDrosophilareveal the impact of domain-specific changes in nucleosome repeat length on repair efficiency
Source: HighWire-hosted journal article supplement (doi:10.1101/gr.279605.124), 2025-01-06
Supplement: Supplemental_Fig_S6.pdf [file Supplemental_Fig_S6.pdf]

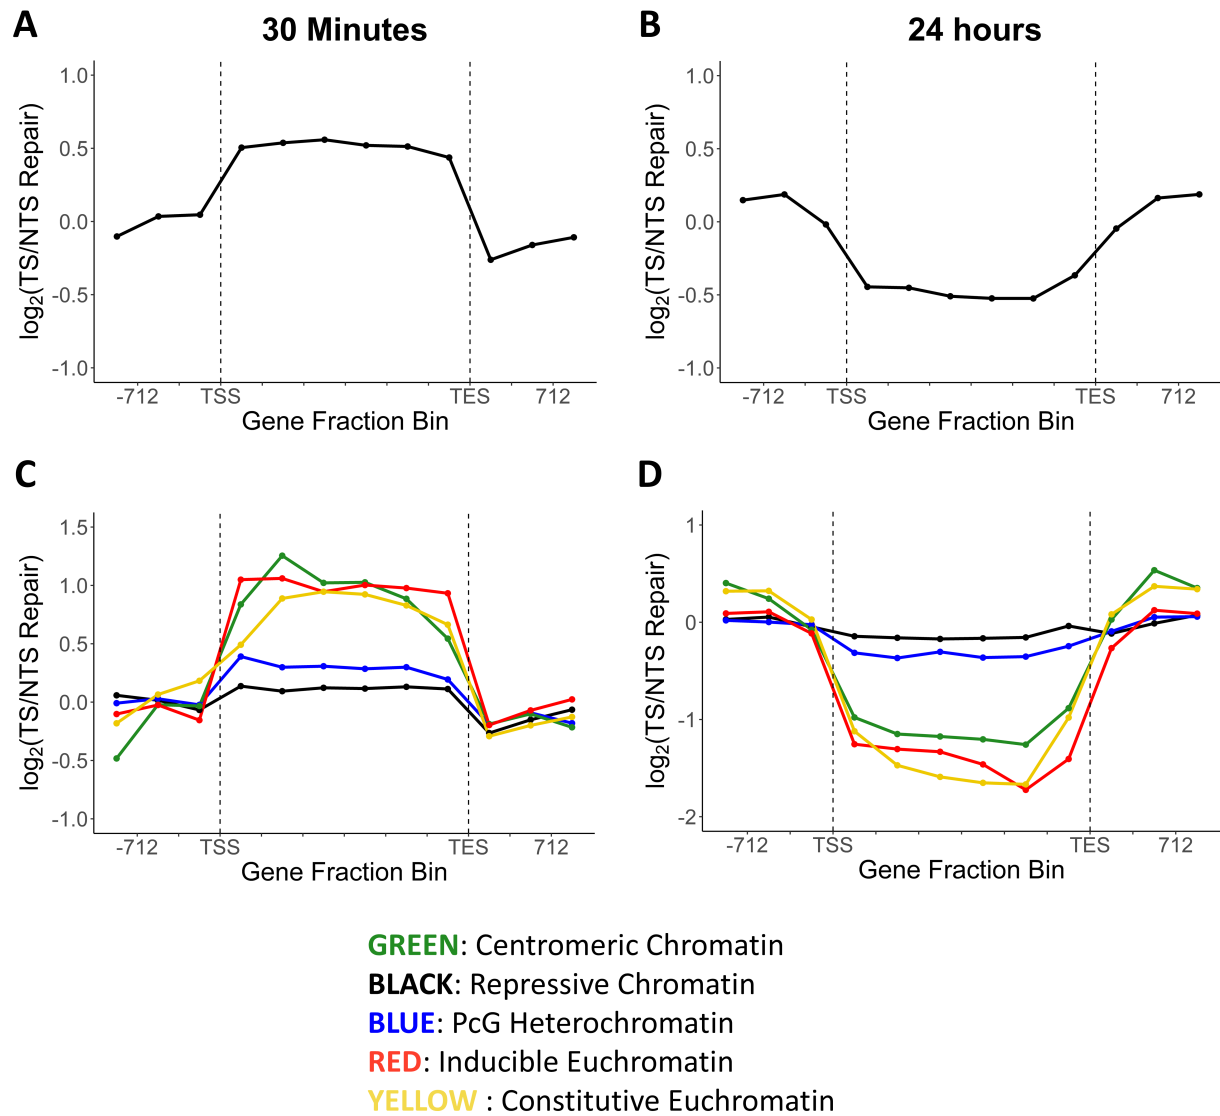

**Figure S6: CPD repair activity in euchromatin is higher on the transcribed strand at early time points and lower at later time points. (A,B)** Transcribed strand (TS) CPD repair activity relative to nontranscribed strand (NTS) repair activity after 30 minutes (A) or 24 hours (B) of repair. **(C,D)** The same data stratified by chromatin type. TSS stands for “transcription start site”, and TES stands for “transcription end site”. Individual data points within the transcribed region represent repair activity binned in each 1/6<sup>th</sup> of each gene throughout the *Drosophila* genome. The size of bins flanking the transcribed region was set at the median bin size within genes (356 bp).
