# Supplementary material for: Ultraviolet damage and repair maps inDrosophilareveal the impact of domain-specific changes in nucleosome repeat length on repair efficiency
Source: HighWire-hosted journal article supplement (doi:10.1101/gr.279605.124), 2025-01-06
Supplement: Supplemental_Fig_S7.pdf [file Supplemental_Fig_S7.pdf]

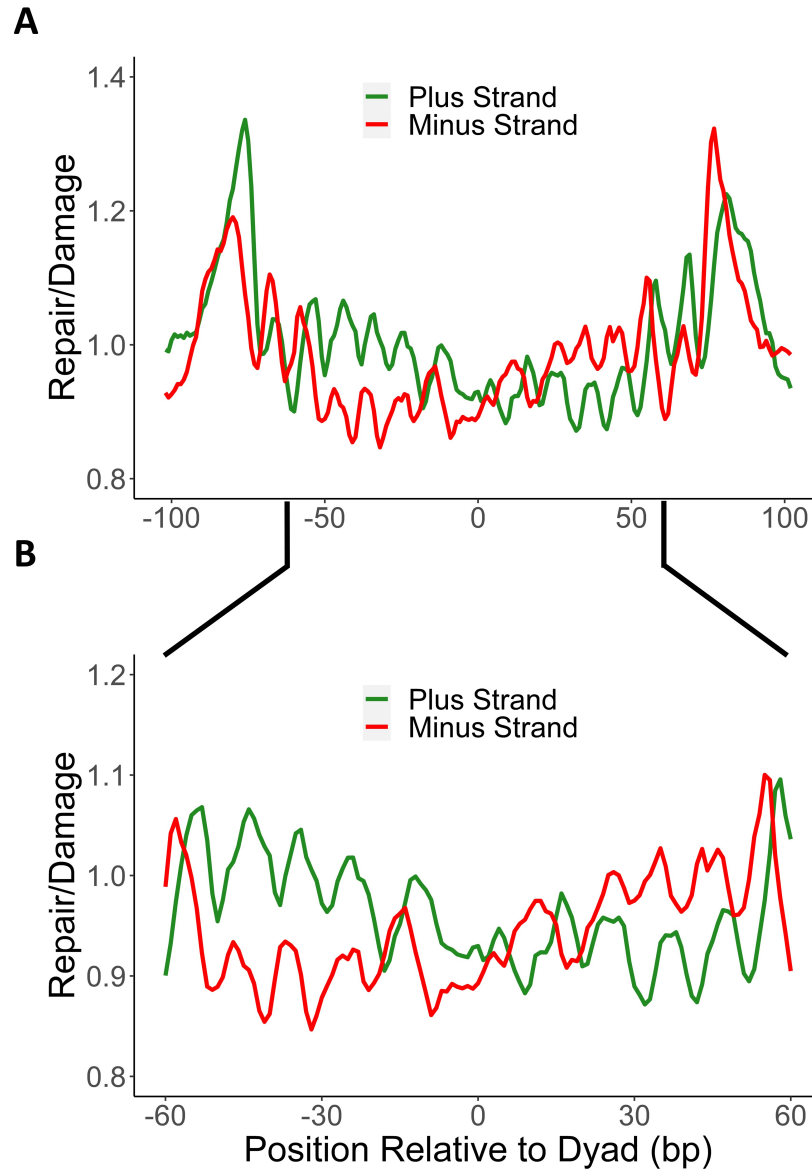

**Figure S7: CPD repair activity in nucleosomes is asymmetric with respect to strand polarity.**

**(A)** CPD repair activity within a single-nucleosome radius, split across the plus (green; 5' to 3') and minus (red; 3' to 5') strands. Data is normalized to cellular damage data. **(B)** The same data as in plot A but with zoomed-in axes to highlight the asymmetry.
