# Supplementary material for: Ultraviolet damage and repair maps inDrosophilareveal the impact of domain-specific changes in nucleosome repeat length on repair efficiency
Source: HighWire-hosted journal article supplement (doi:10.1101/gr.279605.124), 2025-01-06
Supplement: Supplemental_Fig_S8.pdf [file Supplemental_Fig_S8.pdf]

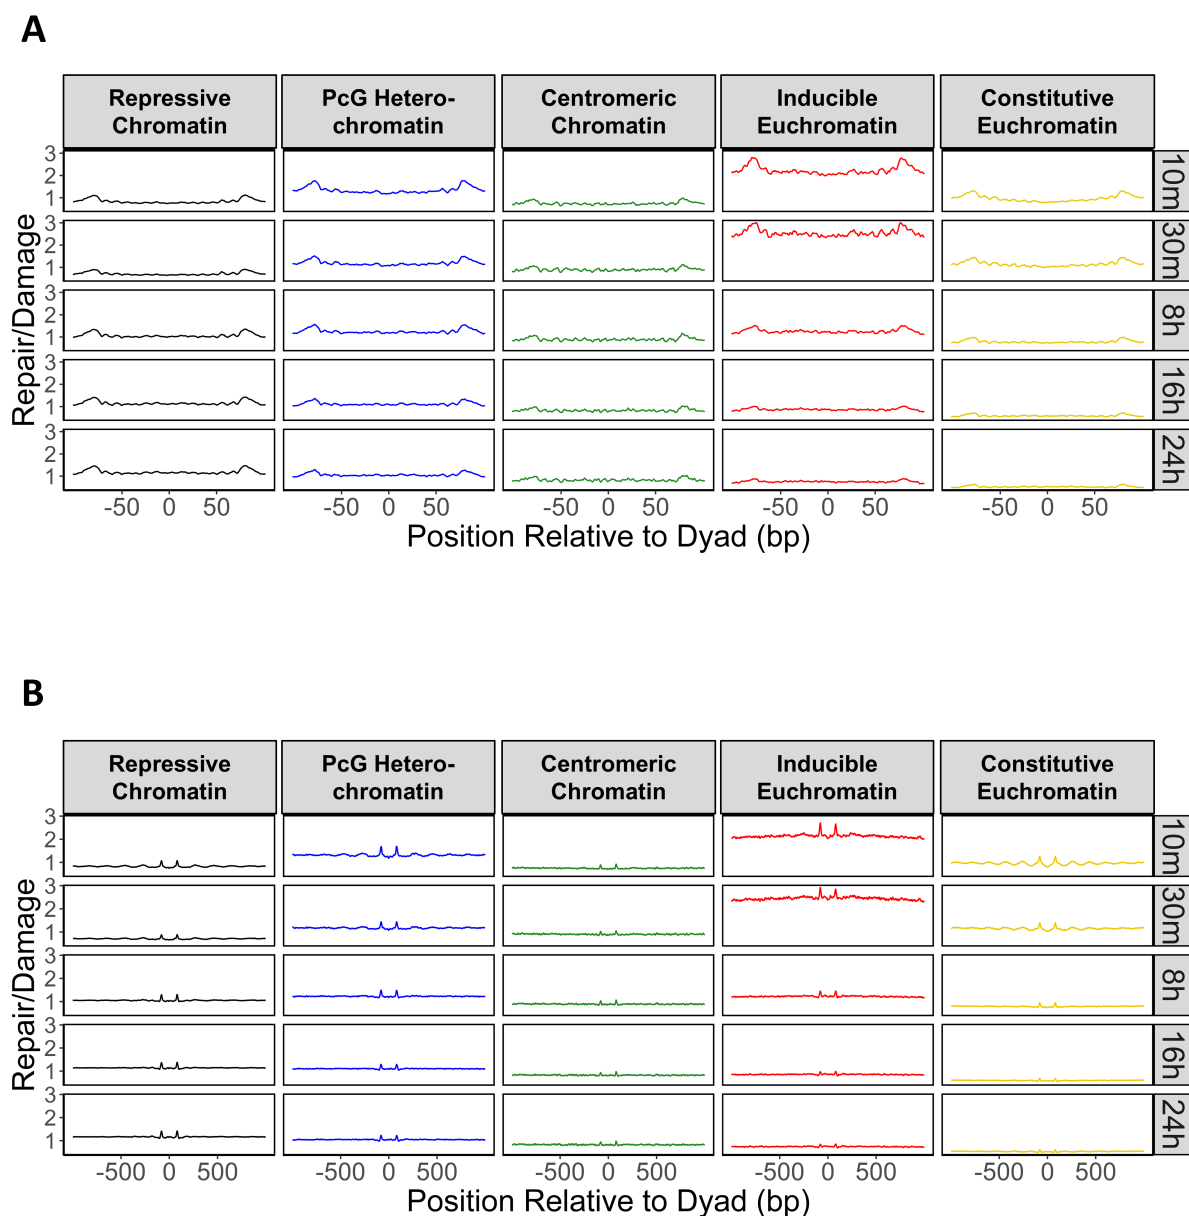

**Figure S8: Mean CPD repair activity around nucleosomes vary across chromatin types and time points.** (A,B) CPD repair activity within 103 bp (A) or 1000 bp (B) of nucleosome dyads (to emphasize rotational and translational positioning, respectively), stratified by chromatin type and time point. These plots were derived using the same data from figures 3C (A) and 4D (B) but without scaling individual subplots to a mean of 1. Instead, plots are scaled based on the ratio of sequencing reads in the repair vs. damage data to highlight relative differences in repair.
