# Supplementary material for: Ultraviolet damage and repair maps inDrosophilareveal the impact of domain-specific changes in nucleosome repeat length on repair efficiency
Source: HighWire-hosted journal article supplement (doi:10.1101/gr.279605.124), 2025-01-06
Supplement: Supplemental_Fig_S9.pdf [file Supplemental_Fig_S9.pdf]

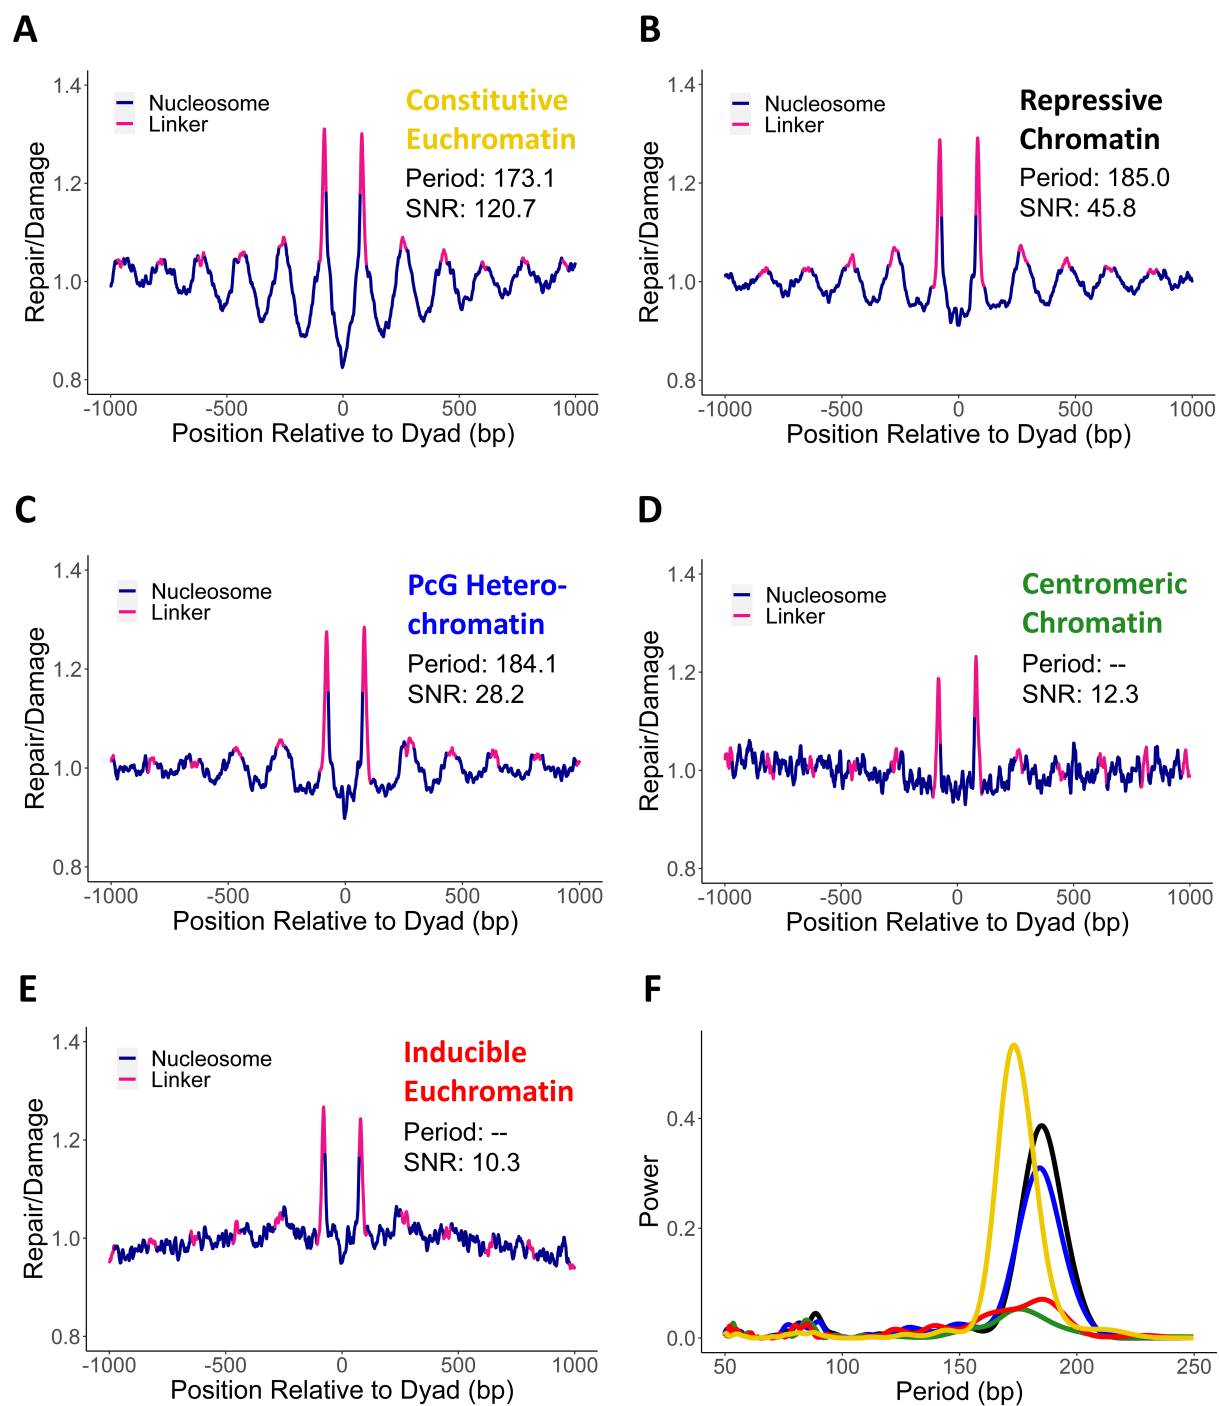

**Figure S9: The strength and period of translational CPD repair patterns are consistent at an earlier time point. (A-E)** CPD repair activity (10min) with respect to translational nucleosome positioning for constitutive euchromatin (A), repressive chromatin (B), PcG heterochromatin (C),

centromeric chromatin (D), and inducible euchromatin (E). All repair data (A-E) are normalized to cellular damage data. Periods were not assigned to centromeric chromatin (D) and inducible euchromatin (E) due to the diminished SNR values. **(F)** Lomb-Scargle periodogram showing translational repair periodicities for each chromatin type.
